# Supplementary material for: Outcomes of parenteral nutrition in patients with advanced cancer and malignant bowel obstruction
Source: PubMed Central journal article supplement (PMC10680932; doi:10.21203/rs.3.rs-3455273/v1), 2023-11-14
Supplement: NIHPPrs3455273v1-supplement-1.pdf [file NIHPPrs3455273v1-supplement-1.pdf]

### Supplementary Table 1

Diagnosis codes utilized for capture of patients from electronic data warehouse.

|                          |                                                                              |
|--------------------------|------------------------------------------------------------------------------|
| <b>Bowel obstruction</b> | <b>560.8, 560.81, 560.89, 560.9</b>                                          |
|                          | K56.50, K56.51, K56.52, K56.690, K56.691, K56.699, K56.600, K56.601, K56.609 |

**AND (any of these):**

|                                                                 |                                                                             |
|-----------------------------------------------------------------|-----------------------------------------------------------------------------|
| <b>Intra-abdominal metastatic disease</b>                       | <b>197.4, 197.5, 197.6, 197.7, 197.8, 198.0, 198.1, 197.6, 197.7, 199.0</b> |
|                                                                 | C78.4, C78.5, C78.6, C78.7, C78.89, C79.00, C79.11, C79.19, C80             |
| <b>Malignant neoplasm of the stomach</b>                        | 151.3, 151.4, 151.9, 151.8, 151.5, 151.6, 151.0, 151.1, 151.2               |
|                                                                 | C16.1, C16.2, C16.8, C16.9, C16.5, C16.6, C16, C16.4, C16.0                 |
| <b>Malignant neoplasm of the small intestine</b>                | 152.9, 152.8, 159.0                                                         |
|                                                                 | C17.9, C17.8, C26.0                                                         |
| <b>Malignant neoplasm of the colon</b>                          | 153.6, 153.1, 153.2, 153.3, 153.8, 153.9, 143.0, 153.7, 153.4               |
|                                                                 | C18.2, C18.4, C18.6, C18.7, C18.8, C18.9, C18, C18.3, C18.5, C18.0          |
| <b>Malignant neoplasm of the rectosigmoid junction</b>          | 154.0,                                                                      |
|                                                                 | C19                                                                         |
| <b>Malignant neoplasm of the rectum</b>                         | 154.1, 154.8                                                                |
|                                                                 | C20, C21.8                                                                  |
| <b>Malignant neoplasm of the anus and anal canal</b>            | 154.3, 154                                                                  |
|                                                                 | C21.0,                                                                      |
| <b>Malignant neoplasm of the pancreas</b>                       | 157, 157.0, 157.1, 157.2, 157.9, 157.3, 157.8                               |
|                                                                 | C25.0, 25.1, C25.2, C25.9, C25.3, C25.8, C25.7                              |
| <b>Malignant neoplasm of the bile ducts</b>                     | 155.1, 156.1, 155, 156,                                                     |
|                                                                 | C22.1, C24.0, C24.8                                                         |
| <b>Malignant neoplasm of the retroperitoneum and peritoneum</b> | 158, 158.9, 158.8, 159, 159.9                                               |
|                                                                 | C48.2, C48.1, C48.8, C26.9                                                  |
| <b>Mesothelioma of the peritoneum</b>                           | 158.8                                                                       |
|                                                                 | C45.1                                                                       |
| <b>Malignant neoplasm of the appendix</b>                       | 153.3                                                                       |
|                                                                 | C18.1                                                                       |

|                                           |                                                                             |
|-------------------------------------------|-----------------------------------------------------------------------------|
| <b>Intra-abdominal metastatic disease</b> | <b>197.4, 197.5, 197.6, 197.7, 197.8, 198.0, 198.1, 197.6, 197.7, 199.0</b> |
| <b>Malignant neoplasm of the bladder</b>  | 188.9, 188.1, 188.5, 188.0, 188.3, 188.2, 188.4, 188.8, 198.1               |
|                                           | C67.9, C67.1, C67.5, C67.0, C67.2, C67.3, C67.4, C67.8, C66, C79.19         |
